# Supplementary material
Source: Springer Nature journal article supplement (https://mijn.bsl.nl/resource/supplementary/13047_2012_492_MOESM1_ESM.pdf/7473936)

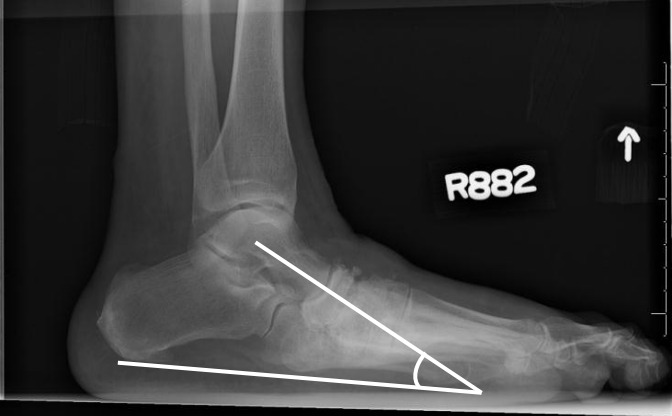

R882

Talar Declination Angle

Supplement: MOESM1 [file 7473936]
